# Supplementary material for: Sub-cloud Rain Evaporation in the North Atlantic Ocean
Source: Copernicus journal article supplement (doi:10.5194/egusphere-2022-1143), 2022-11-22
Supplement: Supplementary file [file egusphere-2022-1143-AC1-supplement.pdf]

**Response to referee comments on “Sub-cloud rain evaporation from shallow convection in the north Atlantic winter trades” by M. Sarkar, A. Bailey, P. Blossey, S. d. Szoeke, D. Noone, E. Q. Melendez, M. Leandro and P. Chuang.**

We thank both the referees for their recommendations and comments on the manuscript. We believe these feedbacks have made our manuscript more comprehensive and informative. The referee comments are shown in blue and author answers in black.

---

Reply to Referee #1 comments:

Major changes have been incorporated throughout the manuscript since the last submission in terms of paragraph organization and story-telling. The introduction and conclusions are rewritten to make the paragraphs tighter and clearer. The broader implications of this work are also discussed in the introduction. The comparison with previous campaigns has been removed from the introduction and discussed more elaborately in the results and conclusions sections. Some figures have been removed, others improved, to better represent the theme of our work.

In addition to some unit corrections in the code, the vertical resolution is also improved. Instead of a fixed 50 m vertical resolution, a nominal step size of 1 m is used. In addition, an adaptive step size is employed to make the model stable and adaptive for very small droplets. The MATLAB code function is made available to the ACP for publication. The improvements have led to an increase in the overall rate of evaporation. This has increased the rain evaporation fluxes and the surface d-excess of rain.

**General comments:**

1. The model formulation by Graf et al. 2017 has not been tested using aircraft observations of microphysics and atmospheric thermodynamic profiles to my knowledge. Previously observations of vapor and precip in these types of analysis were limited to near-surface observations. Often there are many unconstrained parameters such as the droplet sizes, lower tropospheric relative humidity, and rain and vapor isotopic compositions. The unique initialization and sensitivity tests that the authors do are valuable. However, it is difficult to discern the contribution of this effort to the field in its current form.

Our work provides observationally estimated analysis of sub-cloud rain evaporation, which we believe, would improve our overall knowledge of the shallow cloud processes.

The model formulations such as used in Graf et al. 2017 have indeed not been tested using aircraft microphysical and thermodynamic observations. This makes our work distinct and novel since we incorporate the high-resolution microphysical rain data from the aircraft to study rain evaporation. Following this, we also present a novel way to estimate the fraction of rain evaporated, rain evaporated flux in the shallow rain regimes, and their dependence on the microphysical and thermodynamic factors using aircraft observations, something that has not been done before to our knowledge. These estimates provide us a base to compare them with other rain regimes and from climate models.

Further, the rain evaporation budgets have been compared with those roughly estimated from other field campaigns. This brings perspective to the importance of sub-cloud rain evaporation in shallow clouds compared to other components of BL fluxes.

This study also highlights the importance of microphysical processes as opposed to the thermodynamic processes alone. The role of thermodynamics in effecting rain evaporation has been well established by previous works, such as Worden et al. 2007 and Risi et al. 2021. This could be done due to the ease of availability of thermodynamic observations in the sub-cloud layer.

However, our study clearly indicates how the thermodynamic processes alone would not be sufficient in explaining the rain evaporation processes. The results indicated how the microphysical processes in the sub-cloud layer are also influential in effecting rain evaporation. This was solely possible due to the rain evaporation model constrained by the microphysical datasets from the aircraft.

2. There is a lot of hand waving about whether the model constrained by the P3 observations can reproduce rain isotope values at the surface samples from the Ron Brown. The authors show that the model does not reproduce d-excess at the surface without a large change in relative humidity assumptions or larger drop sizes at cloud base. What do we learn about the representativeness of the model from this analysis?

The improvement in the model now shows that the modeled isotope ratios closely match the surface observations so long as the variations in relative humidity conditions are accounted for. We increase the  $RH_{sf}$  of all the P3 cases to 85% to match the  $RH_{sf}$  from the Brown observations. Doing so increases the modeled d-excess for the P3 to match those from the Brown.

Further, two cases from the P3 for which observed  $RH_{sf}$  are 86%, have the modeled d-excess of 9 permil which matches the surface-based d-excess observations very well. All this lends credibility to our model and emphasizes that if the initialized  $RH_{sf}$  in the model is accurate, then the model outputs would be accurate as well. Therefore, the rain evaporation analysis can sufficiently rely on the model provided that the  $RH_{sf}$  is defined well. This has been explained further in the manuscript with the help of the new model results.

3. Fig 13 is an important 'take-away' figure, but it is difficult to understand. The model is challenged to reproduce surface rain d-excess values of >8 permil. I'm trying to find what the starting cloud-base d-excess values are based on the P3 observations. Fig 7 is the only thing I can find and that shows model values of ~10 permil. Little change in rain drop d-excess would suggest very small rain evaporation rates. Is it possible that d-excess is not a strong indicator of evap rates? Would dD or d18O be more sensitive? Many of the figures show vertical profiles of dD or d18O, but then the model is only tested against d-excess at the surface. How does it perform against d18O and dD?

The d-excess is more sensitive to the rain evaporation compared to d18O or dD alone. This is because while the variations in dD and d18O could be due to both equilibrium and kinetic fractionations, the d-excess cancels out the covariations in dD and d18O due to equilibrium fractionations. Rain evaporation, which is essentially a non-equilibrium process, is therefore more suited to be analyzed using d-excess.

This becomes clearer from the histograms in figure 10 for dD, d18O and d-excess. The effect of rain evaporation (through changes in  $RH_{sf}$ ) is evident in d-excess. At low RH, d-excess is small and vice-versa. Comparatively, the effect of RH is less distinct, especially for dD, for which the histograms overlap. This makes d-excess more to study rain evaporation compared to dD or d18O alone.

The isotope ratio information used to initialize the model at cloud base has now been described in the caption of figure 10 (earlier figure 13). The vertical profile of dD, d18O and d-excess for all the 22 cases are included in figure 7g-i. We hope this makes our isotope analysis clearer.

What about the percentage of rain evaporated? The abstract sets up a relationship between the percent rain evaporated and d-excess, but this figure doesn't demonstrate that link or how different the percent evaporated estimates may be in the different cases.

The relationship between the percentage of rain evaporated and the d-excess is now shown in the appendix figure A1. The  $F_{eT}/F_p$  or REF is the fraction of rain evaporated, and it is proportional to the fractional change in d-excess defined as  $1-(d_{p,sf}/d_{p,cb})$  over the P3 cases where rain reach the surface.

The fit has RMSE=0.18 and SSE=0.6 with a polynomial equation of:

$$REF = p1*(1-(d_{p,sf}/d_{p,cb}))+ p2$$

Coefficients (with 95% confidence bounds):

$$p1 = 0.5941 \text{ (0.2289, 0.9594)}$$

$$p2 = 0.182 \text{ (-0.1298, 0.4937)}$$

In this way, the fraction of rain evaporated in the sub-cloud layer could be estimated from the change in d-excess.

4. One important observation in the abstract concerns the vertical structure of rain evaporation which is sensitive to the droplet size distributions rather than the droplet concentrations. Is this droplet-resolving model unique in that regard? In other words, does the non-isotopic information provide any valuable insight as well?

We are not aware of any previous study that has looked into the sensitivity of the vertical rain evaporation structure to the microphysical parameters. However, LES studies in Sandu et al. 2011 are conducted that show how increased precipitation at cloud base could affect the mixing state of the sub-cloud layer. The conceptual models in Paluch & Lenschow 1991 and those discussed in Srivastava 1985, also describe how the rain evaporation could affect the vertical temperature profile in the marine boundary layer. However, these works only look at how the thermodynamic changes affect the BL.

Comparatively, in our work, we were able to delve into both the microphysical and thermodynamic effects on the rain evaporation. This was made possible by the drop-resolved feature of the model. The model results show how strongly the vertical structure of the rain evaporation is linked to  $D_g$ ,  $\sigma$  (shape), and not to  $N_0$  (magnitude) of the raindrop size distribution (RSD) in figure 8b-d. Together, the model provides insight on the importance of cloud base microphysical properties to the rain evaporation processes in the sub-cloud layer.

5. How do the isotope observations improve understanding compared to other methods used in the field?

One important perspective that the isotope observations give us is that the change in d-excess across the sub-cloud layer is indicative of the fraction of rain evaporated. This correlation could be utilized by comparing the aircraft isotope measurements at cloud base and surface to obtain a rain evaporation estimate. This isotope-inferred estimate could be compared with microphysically-inferred estimate to obtain two independent estimates of rain evaporation. An independent isotope estimated rain evaporation is also useful because microphysical measurements are pretty uncertain. The isotope perspective would help in reducing observational errors and making the isotope-microphysical derived relationships more robust.

6. Title could be improved by mentioning the model and observations.

The title has now been changed to “Sub-cloud rain evaporation from shallow convection in the north Atlantic winter trades”.

7. Overall, there are many figures. Are they all important for telling your story?

Some of the figures in the original manuscript has been removed, reducing the total number of figures from 13 to 10. Among these are some new figures and some improvements on the old figures which we believe represent the manuscript more concisely. Three figures are also being added in the appendix for additional details.

8. One valuable contribution that the authors could provide is making this vertically-resolved model publicly available. I encourage the authors to share their code with the community. It could be useful for providing Monte-Carlo estimates of surface rain isotopic composition in future studies.

We completely agree on this. The code will now be made available along with the manuscript.

**Specific comments:**

Consistent unit notation needed throughout. E.g. mm day<sup>-1</sup>, W m<sup>-2</sup>

Done.

Line 20: Which is more common in the field to describe? Evaporative flux or latent heat flux?

Generally latent heat flux is used to describe the flux due to any phase change. But since phase change can be from condensation as well as evaporation, we have clarified the sentence further as “Rain rates on the scale of 1 mm/day, commonly associated with shallow cumulus precipitation, are capable of producing roughly 28 Wm<sup>-2</sup> of latent heat flux through rain evaporation in the sub-cloud layer...”. L21

Line 60: ‘its’ can be unclear. Edit to mention rain drop isotopic enrichment

The sentence has been further simplified as “This is because as rain evaporates into the unsaturated sub-cloud layer, the isotopically light water transitions to the vapor phase more efficiently, causing the drops to become increasingly heavy (Salamalikis et al., 2016; Graf et al., 2019).” L58

Line 61: define RSD at first use

The RSD is defined at its first use in the new version of the manuscript.

Line 87: is there a citation for the reliable/unreliable size ranges?

There are no specific citations available for the ranges. Information on the reliability of the drop size ranges is obtained through direct correspondence with the data authors (Leandro and Chuang, 2021) who are also the co-authors of this paper. The details on the size ranges of the CIP and PIP instruments could be referred from the website: <https://www.dropletmeasurement.com/>.

Line 92: provide units for parameters in the equation.

Done. The new sentence reads "The rain rates (in mm/day) are calculated from the observed RSD using  $R = \dots$ " L98

Line 106-107: consider moving this sentence before "During ATOMIC"

The sentence has now been moved to the beginning. L112

Line 117: Mention or cite Picarro calibration and data correction.

The Picarro uncertainties are now mentioned. L109 and 114.

Line 125: Several assumptions are made here. What implications does this have? In what way is the system in steady state? Equations 9 and 10 contain terms for the vapor from rain evaporation. Why state that it's neglected?

The line stating that the vapor contribution is neglected was confusing and is now removed. The steady state condition of the model implies that no new vapor source is introduced in the model, and that the ambient vapor already includes the evaporated vapor from rain that has taken place already.

The other assumption about ignoring any collision-coalescence process or drop interaction between the aircraft sampling altitude and the cloud base is now defined in L229. The assumption is backed by the similarity in the microphysical parameters that is seen for samples closer to cloud base and those higher up in figure 5.

Eqns 1 and 2: Were  $dD/dz$  and  $dTr/dz$  calculated for each diameter bin?

Yes, the  $dD/dz$  and  $dTr/dz$  are computed for each diameter bin. This is now explained from L142-168.

Line 129-130: Can you include some of the dropsonde data that confirms linear decrease in RH through the atm in a SI figure?

A new figure A3 shows the linear decrease of RH with height for all the dropsondes from the P3.

Line 133: Cite source of Eqn 1?

Done.

Line 134: list parameters and names one at a time so it's easier to match up.

Done.

Eqn 3: might help if it's shown as  $RWC(z)$ .

The RWC term in equation 3 is now described as being calculated at vertical level  $z$  (L169).

Equations: For all equations that are evaluated at altitude ( $z$ ) steps or bin sizes ( $i$ ), write the equations indicating that.

All the equations have been modified accordingly.

Line 149: is  $L$  defined somewhere?

$L$  is defined at L164.

Line 160: was the assumption that the BL was well mixed and 150 m  $\Delta_{\text{vapor}}$  observations are representative of the BL supported by the other observations?

The BL mixing is supported by the dropsonde profiles where the average specific humidity decreases from 15 g/kg to 13 g/kg from surface to 700 m (refer to Figure A3).

Line 162: All parameters obtained from Graf 2017 except the drop sizes.

The improved code includes parameters from Graf 2017, Salamalikis et al. 2016 as well as Pruppacher and Klett-2010.

Line 167: "validate the accuracy of the model" might be a reach given the current conclusions.

The improved model brings the modeled values closer to the observations and therefore increasing the accuracy of the model. This has been discussed further in section 3.4.2.

Line 170-174: I'm having a hard time understanding how Eqn 9 is calculated.  $q_e$  is considered negligible, so  $q_v = q_{va}$ ?  $q_{va}$  is assumed constant but  $q_v$  is calculated every 50 m? I'm getting stuck on what is allowed to change in the model, but doesn't change much versus what isn't allowed to change in the model.

In the revised manuscript, we have clarified how  $q_e$  is not negligible, and how to determine the evaporated rain concentration by using  $F_e$  and moisture accumulation time. This part is in sections 2.3 and 3.5.

Additionally,  $\delta a_{va}$  is kept constant for the  $\delta a_p$  calculation (equation 10). This is done under the steady state assumption of the model where rain evaporation is assumed to already have taken place, and so the ambient vapor  $\delta a_{va}$  includes the effects of the rain evaporation already.

Eqn 10: Earlier it was mentioned that  $\delta v$  doesn't change with altitude?

$\delta a_{va}$  does not change with altitude, but  $\delta v$  should.

Methods: This system of equations has parameters that feed back onto other equations. How were these solved at steady state? Iteratively? Please provide details.

Done. Line 142-168.

Line 198: define rain frequency metric

Done. L239.

Line 225: location of the RICO campaign?

The location of the RICO campaign along with CSET and ASTEX is now given in the introduction line 37.

Line 234 and Fig 5d: I do not see the negative correlation between RH and rain rate. Can you provide statistical evidence? This seems contrary to expectations.

The negative correlation is based only on the P3 datasets (red and black circles in figure 5d). The slope is negative with  $SSE=0.06$ . We speculate that the negative correlation could be due to the drier airmass from the free troposphere that could be reaching the surface through the downdrafts making the surface drier and reducing RH at surface.

line 236: 4 out of 5 cases were above 84%?

The 5 CSET cases had 84%, 84%, 84%, 74% and 83% surface RH (table 3, Sarkar et al. 2020).

Line 243: 'slightly lesser' is awkward

This line is now removed.



Line 252 and Fig 7: I see vertical profiles in Fig 7. I don't understand what the cases denoted by altitudes represent. Altitudes of what?

The figure 7 is now improved to include all the 22 cases instead of just 4 cases. The plots show the modeled outputs and the altitudes refer to the altitude at which the model parameters were computed.

Line 327: "independently evaluating" the modeled P3 cases is misleading. There are no validation observations at the surface.

The Brown, Meteor and BCO surface d-excess observations are used to evaluate the model, by running the model at the surface station observed RH. We have clarified this now in section 3.4.2.

Line 335-341: The differences between Salamalikis and this study for 2 mm drops seems quite large: 64 permil vs 27 permil for dD?

We found some printing mistakes in the Salamalikis et al. paper in some of their empirical values and a formula. Due to these issues, we have now referred to Graf et al. and Pruppacher and Klett work wherever required. Due to this, we have removed this section where we compare the Salamalikis results with ours.

3.4.1 subheading should include modeling like the 3.4.2 subheading

We have taken care of these during the re-editing.

Line 372: give range of d-excess values rather than the spread

The ranges for d-excess along with the dD and d18O are now given.

Line 389-390: this may be an overstatement

The revised model shows a good agreement between the modeled surface d-excess values and the surface observations for those P3 cases where RH at surface was above 75%. Four such P3 have modeled d-excess between 8-11 permil which falls in the observed d-excess range. Additionally, when the model is initialized with 85% for all the 22 P3 cases, then the range of modeled d-excess increase to the observed range. This is better shown in figure 10 histograms. Based on these, we have evaluated the accuracy of the model, explained in section 3.4.2.

Line 392: remind me how the P3 case surface RH is measured? From the drop sondes?

Yes, the RH at surface is obtained from the dropsondes.

line 412: Eqn 10 instead of 9, but the eqn doesn't show weight.

This paragraph has now been rewritten.

Line 416: The conclusion that evaporated water from rain drops doesn't influence the atmospheric vapor isotopic composition might not extend to other cases outside the tropics in drier air masses.

We agree. This conclusion may not be true for cases with stronger Fe or different microphysical conditions, as we have now clarified in the manuscript.

Fig 3: It would be more intuitive to stack the legend labels from highest altitude at the top decreasing toward the bottom.

The legends are ordered based on their time of sampling. We did not find any trend between the altitude of sampling and rain rates. Also, the cases do not represent the same cloud cell. Therefore, we keep the order based on their sampling time for ease of reference.

Fig 6: boxes are difficult to see in my printed version.

The size of the plot is now increased.

Fig 7: Is this modeling for the P3 case or Ron Brown case?

The modeling is done only for the P3 cases.

Fig 9: Is the red modeled or observed RSD at 700 m? While reading the description of this figure, it's difficult to see the features that are described in the text. The relationship between droplets at 700 m and the surface are not indicated. Would arrows help? Is the log-normal fit important or can that be removed? Given the log scale, it's difficult to identify important sizes like 700 and 900 micrometers.

We have removed this figure now since we do not need it to describe our story.

Fig 11: Edit delta symbols. What RH was this model run conducted?

This figure is also removed since the grid resolution for the new model is improved from 50 m to 1 m.

Fig 12: the stacked color bars do not print well. Separate histograms?

We have now used a line histogram that is easier to comprehend.

Fig A2 and others: I don't understand the "altitude for each case." Each case is plotted across all altitudes (0-700 m). For example, in panel d, 2 lines are shown labeled 1354 m with only 1%

difference in RH, but the RWCs are extremely different. If “case altitude” and RH aren’t important, what is?

Yes, there are cases where for similar RH and sampling altitudes, the RWC is different. This is because measurements were made at the same altitudes for separate cloud systems. This gives us two different RSDs for the two different clouds measured at the same altitudes. For such cases, it is the difference in RSD that is responsible for the differences in RWC.
